# Supplementary material
Source: Springer Nature journal article supplement (https://www.springermedizin.de/resource/supplementary/13063_2010_557_MOESM2_ESM.pdf/9618666)

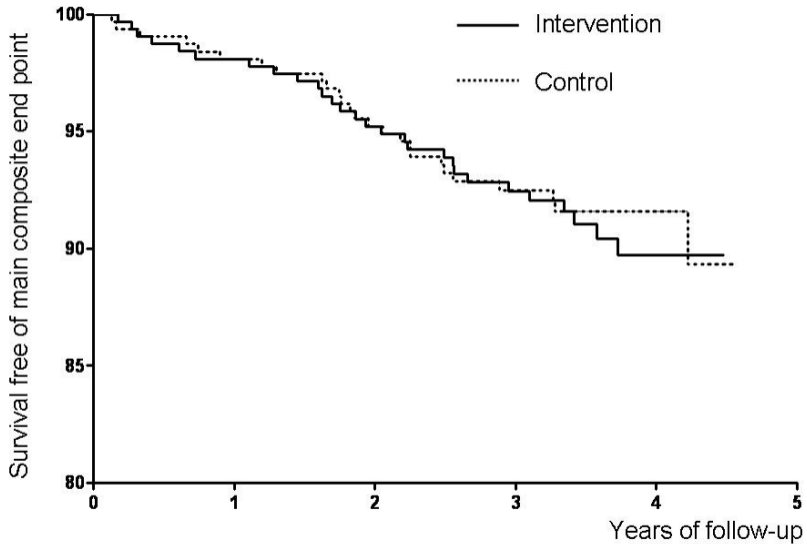

Supplement: MOESM2 [file 9618666]
